# Supplementary material for: Acceptance of a Text Messaging Vaccination Reminder and Recall System in Malaysia’s Healthcare Sector: Extending the Technology Acceptance Model
Source: Preprints.org preprint supplement (doi:10.20944/preprints202306.2058.v1), 2023-06-28
Supplement: Supplementary file 1 [file Appendix A The Snapshots of VHC.docx]

**Appendix A**

1. Login Page

1. Dashboard

1. Patient (Child) Registration

1. Vaccination Report

1. Applied Vaccination Plan

**Figure A1.** The Snapshots of VHC: a) Login Page, b) Dashboard, c) Patient (Child) Registration, d) Vaccination Report, and e) Applied Vaccination Plan.
