# Supplementary material for: Acceptance of a Text Messaging Vaccination Reminder and Recall System in Malaysia’s Healthcare Sector: Extending the Technology Acceptance Model
Source: Preprints.org preprint supplement (doi:10.20944/preprints202306.2058.v1), 2023-06-28
Supplement: Supplementary file 3 [file Appendix B (Measurement Items of Constructs).docx]

| Construct | Items | References |
| --- | --- | --- |
| Perceived compatibility | 1. Using VHC is compatible with all aspects of my work. 2. Using VHC is entirely compatible with my current situation. 3. I think using VHC fits adequately with the way I like to work. 4. I think using VHC fits into my work style. | Moore and Benbasat (1991) |
| Perceived privacy and security issues | 1. Using VHC would lead to a loss of patients’ information privacy since the information collected could be used without our knowledge. 2. Using VHC would lead to a loss of patients’ information security since the information collected could be used without our knowledge. 3. We would be concerned about patients’ information security when using VHC. 4. We would be concerned about patients’ information privacy when using VHC. | Egea and Gonzále (2011); Oliveira et al. (2014) |
| Perceived ease of use | 1. My interaction with VHC would be clear and understandable. 2. Interacting with VHC would not demand a lot of my mental effort. 3. I would find it easy to get VHC to do what I want it to do. 4. I would find VHC to be easy to use. | Egea and Gonzále (2011) |
| Perceived usefulness | 1. Using VHC would improve my effectiveness in my job. 2. Using VHC would improve my job performance. 3. Using VHC would make it easier to perform my job. 4. I would find VHC to be useful in my job. | Egea and Gonzále (2011) |
| Attitude toward using VHC | 1. Using VHC is beneficial for me. 2. Using VHC is a good idea. 3. Working with VHC is pleasant. 4. Overall, my attitude toward using VHC is positive. | Luyten and Marneffe (2021); Egea and Gonzále (2011) |
| Intention to use VHC | 1. I intend to use VHC in the future. 2. I predict I would use VHC in the future. 3. I plan to use VHC in the future. 4. Assuming I had access to VHC, I would intend to use it. | Venkatesh et al. (2003); Egea and Gonzále (2011) |

**Appendix B**

**Table B1.** Measurement Items of Constructs.
